# Supplementary material for: Natural hazard fatalities in Switzerland from 1946 to 2015
Source: Copernicus journal article supplement (doi:10.5194/nhess-2016-232), 2016-07-13
Supplement: Supplementary file 1 [file nhess-2016-232-supplement.pdf]

## Supplementary Material

Table 1 shows the selected keywords for the newspaper research. The keywords were combined with "OR". Since only a simple search was possible (no interlacing), we conducted three searches individually (A, B, C). Including "storm" in the search A would have given too many hits, therefore we had to combine it with the words "wind" or "thunderstorm" to reduce the amount of hits (B).

Table 1 The selected keywords for the newspaper search (translated from German). The keywords are combined with "OR". Three searches were conducted individually (A, B, C). Similar words (e.g. different verb forms or endings) were considered automatically by the search engine.

| A                                                                                                                                                                                                                                                                                                                                                            |                                                                                                                                                                                                                                                                                                                           | B                                                                                                                                                                        |                                                                                                                                                                                | C                                                                                                                                                                                             |                                                                                                                                                                                                                                                                         |
|--------------------------------------------------------------------------------------------------------------------------------------------------------------------------------------------------------------------------------------------------------------------------------------------------------------------------------------------------------------|---------------------------------------------------------------------------------------------------------------------------------------------------------------------------------------------------------------------------------------------------------------------------------------------------------------------------|--------------------------------------------------------------------------------------------------------------------------------------------------------------------------|--------------------------------------------------------------------------------------------------------------------------------------------------------------------------------|-----------------------------------------------------------------------------------------------------------------------------------------------------------------------------------------------|-------------------------------------------------------------------------------------------------------------------------------------------------------------------------------------------------------------------------------------------------------------------------|
| German                                                                                                                                                                                                                                                                                                                                                       | Translation in English                                                                                                                                                                                                                                                                                                    | German                                                                                                                                                                   | Translation in English                                                                                                                                                         | German                                                                                                                                                                                        | Translation in English                                                                                                                                                                                                                                                  |
| (Unwetterschäden<br>heftige Regen<br>Gletscherabbruch<br>Eislawine<br>Hochwasser<br>Überschwemmung<br>Überflutung<br>Erdrutsch<br>Rutschung<br>Erdlawine<br>SchlammLawine<br>Felssturz<br>Steinschlag<br>Bergsturz<br>Unwetter)<br><b>AND</b><br>(tot<br>Todesopfer<br>"ums Leben"<br>Tod<br>Menschenleben<br>ertrunken<br>getötet<br>Leiche<br>verschüttet) | (damage caused by storm<br>heavy rainfall<br>glacial ice avalanche<br>ice avalanche<br>flood<br>inundation<br>landslide<br>landslip<br>mudslide<br>mudflow<br>rockfall<br>rockslide<br>storm)<br><b>AND</b><br>(dead<br>casualty, fatality<br>to perish<br>death<br>human life<br>drown<br>killed<br>dead body<br>buried) | Sturm<br><b>AND</b><br>("Wind"<br>Gewitter)<br><b>AND</b><br>(tot<br>Todesopfer<br>"ums Leben"<br>Tod<br>Menschenleben<br>ertrunken<br>getötet<br>Leiche<br>verschüttet) | storm<br><b>AND</b><br>("wind"<br>thunderstorm)<br><b>AND</b><br>(dead<br>casualty, fatality<br>to perish<br>death<br>human life<br>to drown<br>killed<br>dead body<br>buried) | (Blitz<br>Blitzschlag<br>Blitzschläge<br>Blitzeinschlag<br>Blitzeinschläge)<br><b>AND</b><br>(tot<br>tödlich<br>Todesfall<br>erschlagen<br>getötet<br>"ums Leben"<br>getroffen<br>Todesopfer) | (Lightning<br>Lightning stroke/ strike<br>Lightning strokes/ strikes<br>Lightning stroke/ strike<br>Lightning strokes/ strikes)<br><b>AND</b><br>(dead<br>deadly / fatal<br>event of death<br>struck dead<br>killed<br>to perish<br>hit / struck<br>casualty, fatality) |
